# Supplementary material
Source: publisher figshare collection journal article supplement (https://acs.figshare.com/ndownloader/files/4441540)
Supplement: Supplementary file 1 [file 4441540]

# A Systematic Method Development Strategy for Determination of Pharmaceutical Genotoxic Impurities

Mingjiang Sun, David Q. Liu, Alireza S. Kord\*

*Analytical Sciences, GlaxoSmithKline Pharmaceutical R&D, 709 Swedeland Road, King of Prussia, PA 19406, USA Fax : 610-270-6727*

e-mail: Alireza.S.Kord@gsk.com

## **Derivatization reaction of DMS with 2-mercaptopyridine:**

Standard solution of dimethyl sulfate (DMS) is prepared at about 0.0025 mg /mL after serial dilution, corresponding to 0.1% (w/w) relative to a 2.5 mg/mL sample (starting material) in case study 4.

Derivatization reagent is an aqueous solution of 5 mg/mL 2-mercaptopyridine prepared by dissolving 50 mg of 2-mercaptopyridine in 10 mL of water followed by sonication for 5 minutes. Starting material samples are prepared in duplicate at a concentration of 2.5 mg/mL in acetonitrile. Spike recovery samples are prepared by dissolving 2.5 mg/ml starting material in the standard solution.

Transfer 5 mL of standard solutions, samples, and spike recovery samples into 9-mL vials respectively, to which 1 mL of derivatization reagent solution was added. Mix well and transfer 1 mL of the solutions into 2-mL HPLC vials respectively. The resulting vials are heated on a heating block at 60 °C for 60 minutes before subjecting to HPLC analysis.
